# Supplementary material
Source: PubMed Central journal article supplement (PMC7553038)
Supplement: pt0c00122_si_001.pdf [file pt0c00122_si_001.pdf]

# Supporting Information

## Development of a high-throughput homogeneous AlphaLISA drug screening assay for the detection of SARS-CoV-2 Nucleocapsid

Kirill Gorshkov<sup>1\*‡</sup>, Catherine Z. Chen<sup>1‡</sup>, Miao Xu<sup>1</sup>, Juan Carlos de la Torre<sup>2</sup>, Luis Martinez-Sobrido<sup>3</sup>,  
Thomas Moran<sup>4</sup>, Wei Zheng<sup>1\*</sup>

<sup>1</sup> National Center for Advancing Translational Sciences, 9800 Medical Center Drive, Rockville, MD, 20850

<sup>2</sup> Department of Immunology and Microbiology, IMM6, The Scripps Research Institute, 10550 N. Torrey Pines Rd., La Jolla, CA 92037

<sup>3</sup> Texas Biomedical Research Institute, 8715 W. Military Dr. San Antonio, TX 78227

<sup>4</sup> Icahn School of Medicine, Mt. Sinai, 1 Gustave L. Levy Place, New York, NY 10029

<sup>‡</sup> These authors contributed equally

\*Correspondence:

Corresponding Authors

Kirill Gorshkov – [kirill.gorshkov@nih.gov](mailto:kirill.gorshkov@nih.gov)

Wei Zheng – [wzheng@mail.nih.gov](mailto:wzheng@mail.nih.gov)

## Supporting Information

### Table of Contents

|                                                                                                                                                                            |              |
|----------------------------------------------------------------------------------------------------------------------------------------------------------------------------|--------------|
| Figure S-1 Detection of titrated Nucleocapsid using best antibody pairs                                                                                                    | Page S-3     |
| Figure S-2 Optimization of best antibody pair and reagent concentrations                                                                                                   | Page S-4,5   |
| Figure S-3 Standard curves using best conditions for best antibody pairs                                                                                                   | Page S-6     |
| Table S-1 SARS-CoV-2 Nucleocapsid detection in virally infected cell lysates and tissue culture supernatants.                                                              | Page S-7     |
| Figure S-4 2 vs 3 step assay optimization for best antibody pairs and conditions                                                                                           | Page S-8,9   |
| Figure S-5 Simulation of viral infection in 384 well plates using recombinant NP protein spiked into Vero-E6 wells                                                         | Page S-10,11 |
| Figure S-6 Optimization of assay volumes for 384-well plate using recombinant NP                                                                                           | Page S-12,13 |
| Table S-2 Optimization of lysis buffer and cell density for 384-well plate viral infection simulation using recombinant NP                                                 | Page S-14    |
| Figure S-7 Optimization of AlphaLISA assay using different FBS percentages in cell culture media                                                                           | Page S-15    |
| Figure S-8 Optimization of best antibody pair and reagent concentrations of second preparation to match first preparation                                                  | Page S-16    |
| Table S-3 Optimization of 384-well plate cell number in simulated infection using second preparation of reagents                                                           | Page S-17    |
| Figure S-9 Optimization of lysis buffer, cell density, and incubation time for 384-well plate viral infection simulation using recombinant NP and second batch of reagents | Page S-18,19 |
| Figure S-10 Estimation of viral NP concentration in viral lysates                                                                                                          | Page S-20    |
| Figure S-11 Stability of the assay after 24 hours                                                                                                                          | Page S-21    |

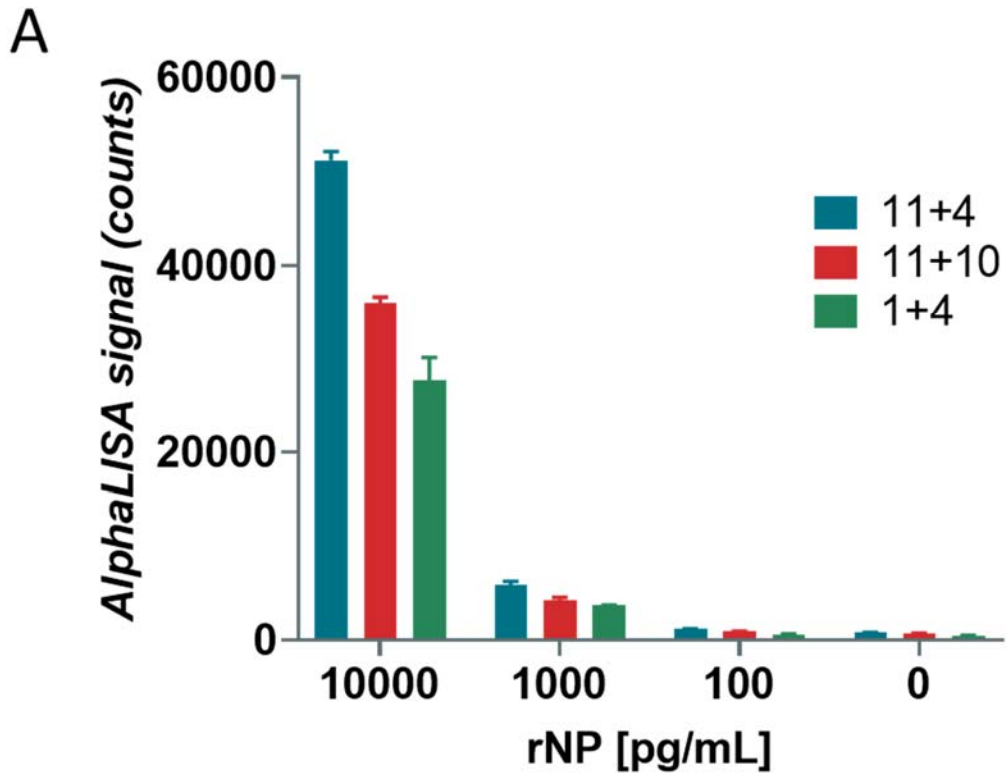

**B**

|              | Signal over Background |       |      |
|--------------|------------------------|-------|------|
| [NP] (pg/mL) | 11+4                   | 11+10 | 1+4  |
| 10,000       | 72.8                   | 51.5  | 66.2 |
| 1,000        | 8.3                    | 6.0   | 8.8  |
| 100          | 1.6                    | 1.3   | 1.5  |

**Figure S-1.** Detection of titrated recombinant NP using best antibody pairs. AlphaLISA counts for **(A)** Pair 1+4, Pair 11+4, Pair 11+10 using 10,000, 1000, 100, and 0 pg/mL of NP. **(B)** Signal over Background (S/B) ratios for best antibody pairs in A. N = duplicate wells. Error bars indicate S.D.

**A**

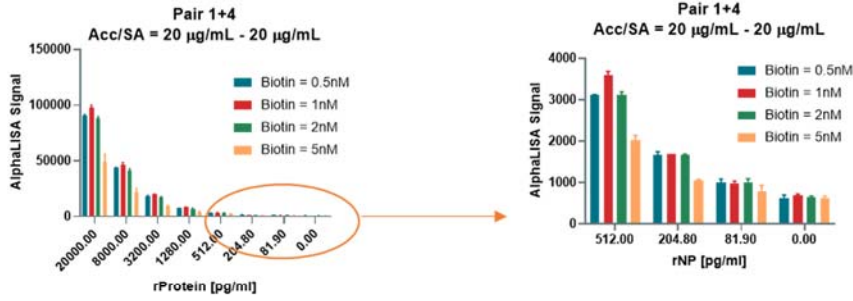

**B**

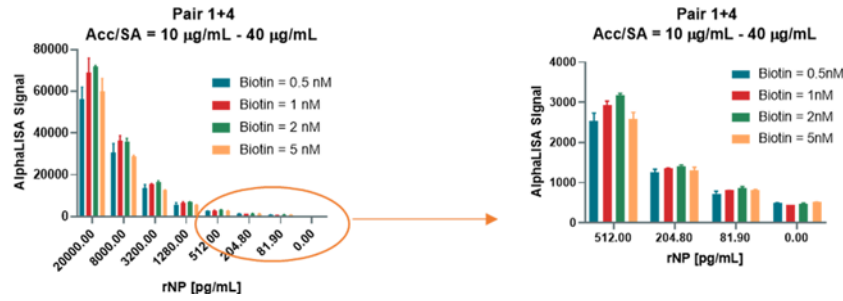

**C**

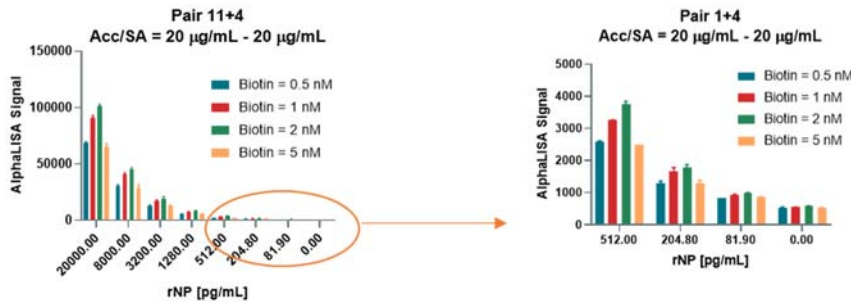

**D**

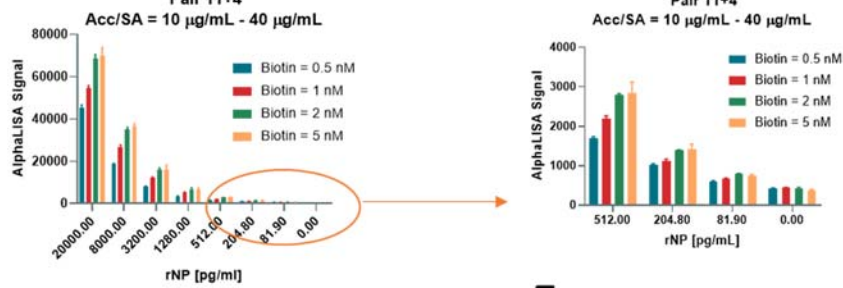

**E**

Pair 1+4

| Signal over Background<br>20 µg/mL - 20 µg/mL |       |       | Signal over Background<br>10 µg/mL - 40 µg/mL |       |       |
|-----------------------------------------------|-------|-------|-----------------------------------------------|-------|-------|
| (pg/mL)                                       | 1nM   | 2nM   | (pg/mL)                                       | 1nM   | 2nM   |
| 20,000                                        | 140.7 | 136.0 | 20,000                                        | 150.2 | 148.6 |
| 8000.0                                        | 67.5  | 63.8  | 8000.0                                        | 79.6  | 74.7  |
| 3200.0                                        | 28.4  | 26.5  | 3200.0                                        | 33.7  | 34.4  |
| 1280.0                                        | 11.7  | 10.9  | 1280.0                                        | 14.6  | 14.5  |
| 512.0                                         | 5.2   | 4.8   | 512.0                                         | 6.4   | 6.6   |
| 204.8                                         | 2.4   | 2.6   | 204.8                                         | 3.0   | 2.9   |
| 81.9                                          | 1.4   | 1.6   | 81.9                                          | 1.8   | 1.8   |
| 0                                             | 1.0   | 1.0   | 0                                             | 1.0   | 1.0   |

**F**

Pair 11+4

| Signal over Background<br>20 µg/mL - 20 µg/mL |       |       | Signal over Background<br>10 µg/mL - 40 µg/mL |       |       |
|-----------------------------------------------|-------|-------|-----------------------------------------------|-------|-------|
| (pg/mL)                                       | 1nM   | 2nM   | (pg/mL)                                       | 2nM   | 5nM   |
| 20,000                                        | 165.1 | 174.8 | 20,000                                        | 158.3 | 182.5 |
| 8000.0                                        | 74.7  | 78.5  | 8000.0                                        | 81.0  | 94.9  |
| 3200.0                                        | 31.3  | 33.5  | 3200.0                                        | 37.1  | 41.2  |
| 1280.0                                        | 13.8  | 14.5  | 1280.0                                        | 15.8  | 17.3  |
| 512.0                                         | 5.9   | 6.5   | 512.0                                         | 6.5   | 7.4   |
| 204.8                                         | 3.1   | 3.1   | 204.8                                         | 3.2   | 3.7   |
| 81.9                                          | 1.7   | 1.7   | 81.9                                          | 1.8   | 2.0   |
| 0                                             | 1.0   | 1.0   | 0                                             | 1.0   | 1.0   |

**Figure S-2.** Optimization of best antibody pair and reagent concentrations. AlphaLISA counts for titrated NP using **(A)** 20 µg/mL acceptor and 20 µg/mL or **(B)** 10 µg/mL acceptor and 40 µg/mL Streptavidin for Pair 1+4 and different concentrations of Biotin. Right panel is scaled section of left panel inside of red circle. AlphaLISA counts for titrated NP using **(C)** 20 µg/mL acceptor and 20 µg/mL or **(D)** 10 µg/mL acceptor and 40 µg/mL Streptavidin for Pair 11+4 and different concentrations of Biotin. Right panel is scaled section of left panel inside of red circle. **(E)** S/B ratios for A and B using 1 nM and 2 nM Biotin. **(F)** S/B ratios for A and B using 1 nM and 2 nM Biotin. N = duplicate wells. Error bars indicate S.D.

**A**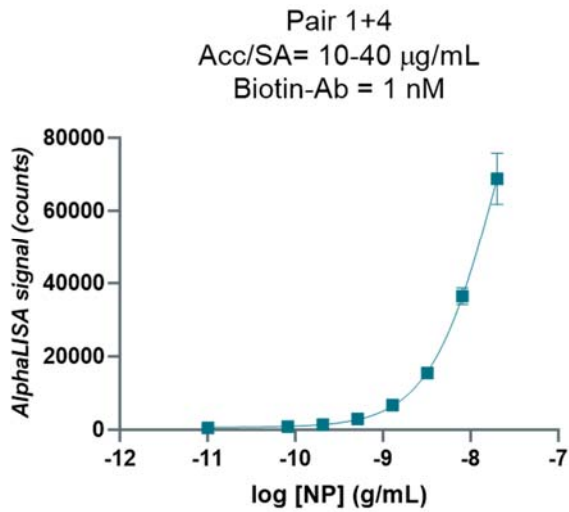**C**

| Signal over Background |       |       |
|------------------------|-------|-------|
| (pg/mL)                | 1+4   | 11+4  |
| 20,000                 | 150.2 | 182.5 |
| 8000.0                 | 79.6  | 94.9  |
| 3200.0                 | 33.7  | 41.2  |
| 1280.0                 | 14.6  | 17.3  |
| 512.0                  | 6.4   | 7.4   |
| 204.8                  | 3.0   | 3.7   |
| 81.9                   | 1.8   | 2.0   |
| 0                      | 1.0   | 1.0   |

**B**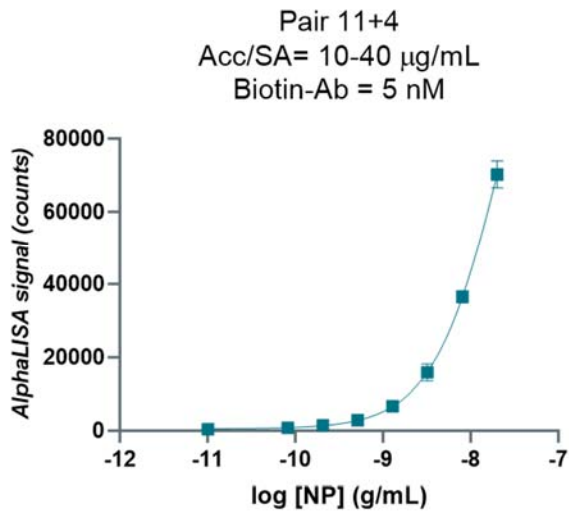

**Figure S-3.** Standard curves using best conditions for best antibody pairs. **(A)** AlphaLISA signal (counts) for titrated NP (g/mL) from 20,000 pg/mL to 0 pg/mL using ACC/SA = 10-40 µg/mL and 1 nM Biotin-Ab for Pair 1+4. **(B)** AlphaLISA signal (counts) for titrated NP (g/mL) from 20,000 pg/mL to 0 pg/mL using ACC/SA = 10-40 µg/mL and 5 nM Biotin for Pair 11+4. **(C)** S/B ratios for graphs 1+4 and 11+4. N = duplicate wells. Error bars indicate S.D.

**A**

| Signal over Background |              |         |
|------------------------|--------------|---------|
| (ng/mL)                | AlphaLISA LB | NCATSLB |
| 200000.0               | 4.1          | 7.4     |
| 40000.0                | 20.3         | 29.0    |
| 8000.0                 | 65.0         | 105.2   |
| 1600.0                 | 152.1        | 296.8   |
| 320.0                  | 233.3        | 514.7   |
| 64.0                   | 167.4        | 355.7   |
| 12.8                   | 88.9         | 74.3    |
| 2.6                    | 36.5         | 8.9     |
| 0.5                    | 12.0         | 2.4     |
| 0.1                    | 6.4          | 1.3     |
| 0.02                   | 3.0          | 1.1     |

**B**

| Interpolated Concentration (ng/mL) |        |
|------------------------------------|--------|
| 24 hr TCS                          | 112.6  |
| 48 hr TCS                          | 981.7  |
| 24 hr Lysate                       | 4,575  |
| 48 hr Lysate                       | 35,276 |

**C**

| Signal over Background |              |         |
|------------------------|--------------|---------|
| (ng/mL)                | AlphaLISA LB | NCATSLB |
| 200000.0               | 28.2         | 28.1    |
| 40000.0                | 69.6         | 88.1    |
| 8000.0                 | 221.9        | 251.6   |
| 1600.0                 | 462.1        | 584.1   |
| 320.0                  | 381.3        | 644.7   |
| 64.0                   | 319.2        | 376.2   |
| 12.8                   | 141.5        | 87.4    |
| 2.6                    | 39.9         | 10.1    |
| 0.5                    | 8.6          | 3.1     |
| 0.1                    | 3.0          | 1.3     |
| 0.02                   | 2.4          | 1.0     |

**D**

| Interpolated Concentration (ng/mL) |          |
|------------------------------------|----------|
| 24 hr TCS                          | 80.3     |
| 48 hr TCS                          | 707.6    |
| 24 hr Lysate                       | 7,382.7  |
| 48 hr Lysate                       | 30,155.8 |

**Table S-1** SARS-CoV-2 Nucleocapsid detection in virally infected cell lysates and tissue culture supernatants. **(A)** S/B ratios for Figure 1A. Values in red show the concentrations at which accurate determination of NP is not possible due to the hook effect. **(B)** Interpolated concentrations in ng/mL of NP in TCS and Lysates collected at 24 or 48 hours using the curve from A. **(C)** S/B ratios for Figure 1C. Values in red show the concentrations at which accurate determination of NP is not possible due to the hook effect. **(D)** Interpolated concentrations in ng/mL of NP in TCS and Lysates collected at 24 or 48 hours using the curve from B.

**A**

Dispensing protocol (2-step assay):

1. Dispense 5 $\mu$ l of protein
2. Dispense 10 $\mu$ l of mix of acceptor beads and biotinylated antibody  
Incubate 60 min at RT
3. Dispense 5 $\mu$ l of SA-Donor Beads  
Incubate 30 min at RT
4. Read plates on EnVision

**B**

Dispensing protocol (3-step assay):

1. Dispense 5 $\mu$ l of protein
2. Dispense 5 $\mu$ l of acceptor beads  
Incubate 60 min at RT
3. Dispense 5 $\mu$ l of biotinylated antibody  
Incubate 60 min at RT
4. Dispense 5 $\mu$ l of SA-Donor Beads  
Incubate 30 min at RT
5. Read plates on EnVision

**C**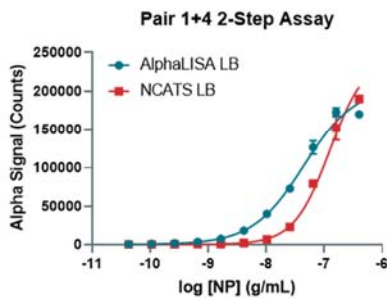**E**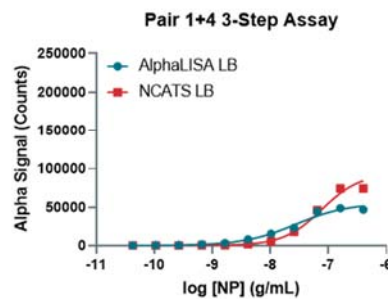**D**

| Signal over Background |              |          |
|------------------------|--------------|----------|
| (ng/mL)                | AlphaLISA LB | NCATS LB |
| 400.0                  | 233.1        | 366.0    |
| 160.00                 | 241.8        | 366.0    |
| 64.00                  | 222.4        | 228.5    |
| 25.60                  | 115.8        | 89.8     |
| 10.24                  | 77.1         | 28.4     |
| 4.10                   | 40.6         | 10.0     |
| 1.64                   | 17.2         | 4.3      |
| 0.66                   | 8.6          | 2.3      |
| 0.26                   | 4.1          | 1.5      |
| 0.10                   | 2.2          | 1.2      |
| 0.04                   | 1.5          | 1.1      |
| 0.0                    | 1.0          | 1.0      |

**F**

| Signal over Background |              |          |
|------------------------|--------------|----------|
| (ng/mL)                | AlphaLISA LB | NCATS LB |
| 400.0                  | 432.7        | 537.5    |
| 160.00                 | 439.6        | 429.9    |
| 64.00                  | 321.7        | 224.1    |
| 25.60                  | 185.4        | 65.1     |
| 10.24                  | 101.8        | 19.1     |
| 4.10                   | 46.6         | 6.4      |
| 1.64                   | 19.4         | 2.9      |
| 0.66                   | 9.3          | 1.8      |
| 0.26                   | 4.3          | 1.3      |
| 0.10                   | 2.3          | 1.1      |
| 0.04                   | 1.4          | 1.0      |
| 0.0                    | 1.0          | 1.0      |

**G**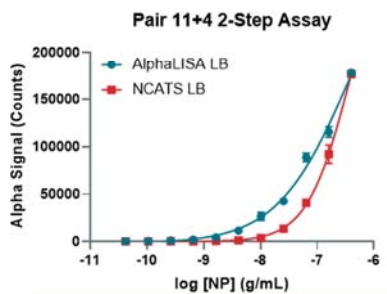**I**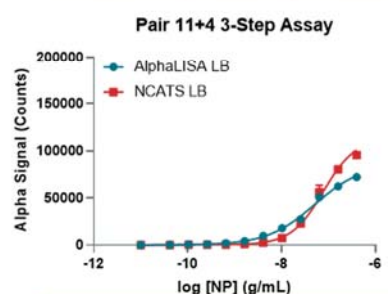**H**

| Signal over Background |              |          |
|------------------------|--------------|----------|
| (ng/mL)                | AlphaLISA LB | NCATS LB |
| 400.0                  | 630.3        | 626.3    |
| 160.00                 | 409.2        | 325.9    |
| 64.00                  | 314.2        | 145.2    |
| 25.60                  | 151.7        | 48.0     |
| 10.24                  | 94.4         | 13.4     |
| 4.10                   | 40.9         | 4.9      |
| 1.64                   | 15.6         | 2.6      |
| 0.66                   | 7.4          | 1.7      |
| 0.26                   | 3.6          | 1.3      |
| 0.10                   | 2.0          | 1.1      |
| 0.04                   | 1.7          | 1.1      |
| 0.0                    | 1.0          | 1.0      |

**J**

| Signal over Background |              |          |
|------------------------|--------------|----------|
| (ng/mL)                | AlphaLISA LB | NCATS LB |
| 400.0                  | 263.6        | 348.5    |
| 160.00                 | 227.7        | 293.7    |
| 64.00                  | 186.4        | 204.9    |
| 25.60                  | 100.5        | 84.2     |
| 10.24                  | 65.8         | 27.9     |
| 4.10                   | 36.2         | 10.1     |
| 1.64                   | 16.2         | 4.3      |
| 0.66                   | 7.7          | 2.1      |
| 0.26                   | 3.8          | 1.4      |
| 0.10                   | 2.6          | 1.5      |
| 0.04                   | 1.7          | 1.1      |
| 0.0                    | 1.0          | 0.8      |



**Figure S-4** 2-step vs 3-step assay optimization for best antibody pairs and conditions. Dispensing protocols for **(A)** 2-step and **(B)** 3-step assay. **(C)** Standard curve for NP using Pair 1+4 and two-step assay protocol using AlphaLISA or NCATS LBs. **(D)** S/B ratios for C. **(E)** Standard curve for NP using Pair 1+4 and three-step assay protocol using AlphaLISA or NCATS LBs. **(F)** S/B ratios for E. **(G)** Standard curve for NP using Pair 11+4 and two-step assay protocol using AlphaLISA or NCATS LBs. **(H)** S/B ratios for G. **(I)** Standard curve for NP using Pair 11+4 and three-step assay protocol using AlphaLISA or NCATS LBs. **(J)** S/B ratios for I. N = triplicate wells. Error bars indicate S.D.

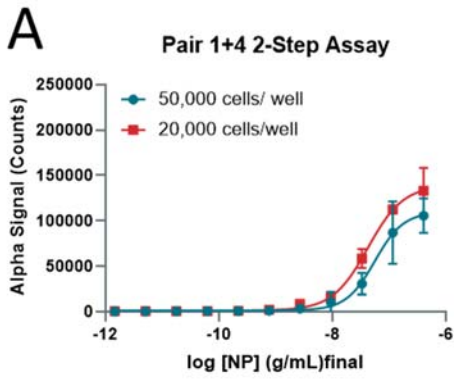

**B**

| Signal over Background |                   |                   |
|------------------------|-------------------|-------------------|
| Final conc.(ng/mL)     | 50,000 cells/well | 20,000 cells/well |
| 400                    | 253.8             | 283.5             |
| 114.286                | 209.2             | 239.9             |
| 32.653                 | 74.1              | 124.4             |
| 9.329                  | 24.7              | 33.2              |
| 2.666                  | 8.1               | 17.9              |
| 0.762                  | 2.6               | 4.7               |
| 0.218                  | 1.5               | 1.8               |
| 0.062                  | 1.9               | 1.2               |
| 0.018                  | 1.5               | 1.0               |
| 0.005                  | 1.0               | 1.0               |
| 0.001                  | 1.0               | 1.0               |
| 0                      | 1.0               | 1.0               |

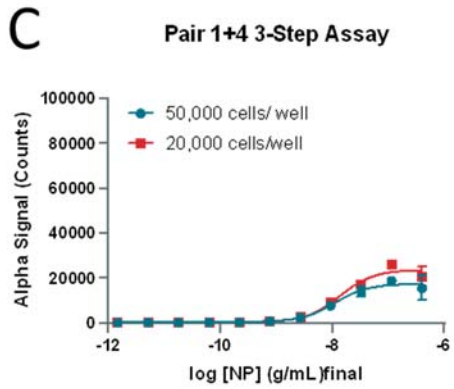

**D**

| Signal over Background |                   |                   |
|------------------------|-------------------|-------------------|
| Final conc.(ng/mL)     | 50,000 cells/well | 20,000 cells/well |
| 400                    | 68.3              | 88.9              |
| 114.286                | 83.2              | 112.7             |
| 32.653                 | 62.0              | 73.9              |
| 9.329                  | 34.3              | 39.0              |
| 2.666                  | 11.0              | 11.4              |
| 0.762                  | 3.8               | 4.3               |
| 0.218                  | 1.6               | 1.7               |
| 0.062                  | 1.2               | 1.2               |
| 0.018                  | 1.0               | 1.0               |
| 0.005                  | 0.9               | 0.9               |
| 0.001                  | 1.0               | 1.0               |
| 0                      | 1.0               | 1.0               |

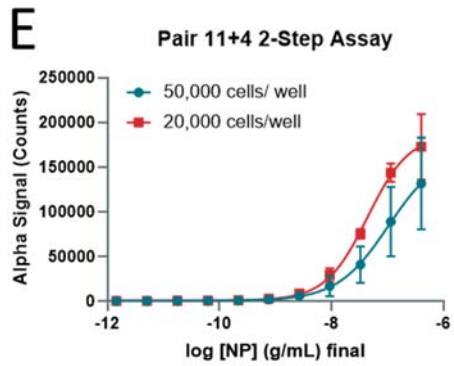

**F**

| Signal over Background |                   |                   |
|------------------------|-------------------|-------------------|
| Final conc.(ng/mL)     | 50,000 cells/well | 20,000 cells/well |
| 400                    | 303.4             | 447.5             |
| 114.286                | 205.2             | 372.5             |
| 32.653                 | 94.3              | 195.1             |
| 9.329                  | 39.3              | 76.2              |
| 2.666                  | 14.3              | 22.9              |
| 0.762                  | 4.6               | 7.2               |
| 0.218                  | 1.6               | 2.8               |
| 0.062                  | 1.2               | 1.7               |
| 0.018                  | 1.0               | 1.2               |
| 0.005                  | 0.8               | 1.0               |
| 0.001                  | 0.9               | 1.1               |
| 0                      | 1.0               | 1.0               |

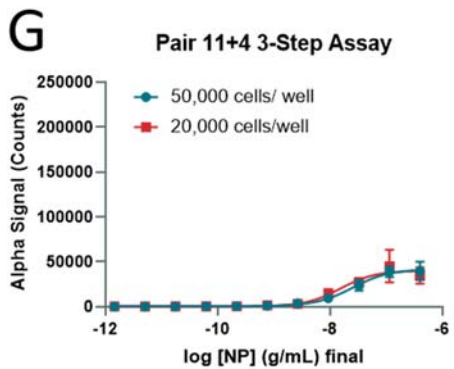

**H**

| Signal over Background |                   |                   |
|------------------------|-------------------|-------------------|
| Final conc.(ng/mL)     | 50,000 cells/well | 20,000 cells/well |
| 400                    | 195.5             | 153.7             |
| 114.286                | 192.0             | 199.6             |
| 32.653                 | 116.4             | 118.6             |
| 9.329                  | 46.5              | 65.7              |
| 2.666                  | 17.8              | 14.1              |
| 0.762                  | 5.3               | 6.0               |
| 0.218                  | 2.1               | 1.9               |
| 0.062                  | 1.2               | 1.3               |
| 0.018                  | 1.0               | 1.0               |
| 0.005                  | 1.0               | 0.9               |
| 0.001                  | 1.0               | 0.9               |
| 0                      | 1.0               | 1.0               |

**Figure S-5** Simulation of viral infection in 384 well plates using recombinant NP spiked into Vero-E6 wells. **(A)** Detection of titrated NP in wells culturing 50,000 or 20,000 Vero-E6 cells using the two-step assay for Pair 1+4. **(B)** S/B ratios from A. **(C)** Detection of titrated NP in wells culturing 50,000 or 20,000 Vero-E6 cells using the three-step assay for Pair 1+4. **(D)** S/B ratios from C. **(E)** Detection of titrated NP in wells culturing 50,000 or 20,000 Vero-E6 cells using the two-step assay for Pair 11+4. **(F)** S/B ratios from E. **(G)** Detection of titrated NP in wells culturing 50,000 or 20,000 Vero-E6 cells using the three-step assay for Pair 11+4. **(H)** S/B ratios from G. N = triplicate wells. Error bars indicate S.D.

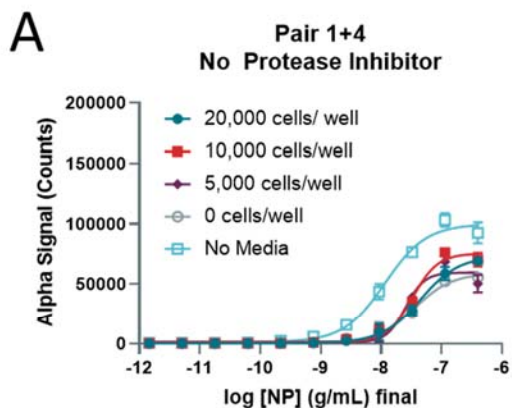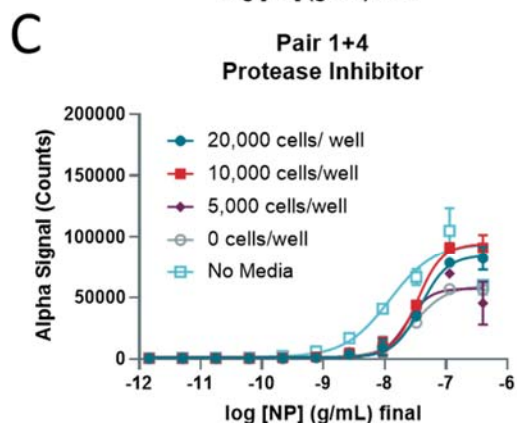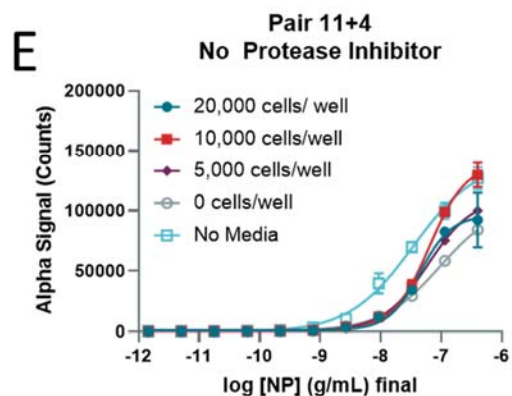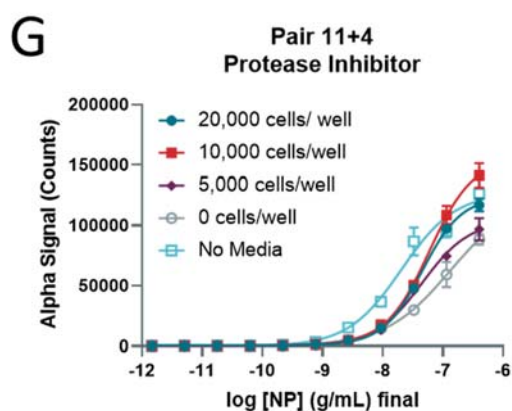

**B**

| Signal over Background |              |              |             |       |          |
|------------------------|--------------|--------------|-------------|-------|----------|
| (ng/mL) final          | 20,000 cells | 10,000 cells | 5,000 cells | Media | No Media |
| 400.00                 | 172.7        | 179.2        | 125.1       | 131.5 | 119.6    |
| 114.29                 | 146.9        | 194.4        | 170.1       | 123.8 | 133.5    |
| 32.65                  | 70.2         | 90.0         | 97.0        | 61.2  | 98.9     |
| 9.33                   | 24.7         | 29.9         | 17.3        | 24.3  | 56.5     |
| 2.67                   | 6.4          | 9.7          | 9.7         | 9.9   | 20.2     |
| 0.76                   | 2.2          | 2.6          | 3.1         | 2.5   | 7.8      |
| 0.22                   | 1.2          | 1.3          | 1.5         | 1.4   | 3.1      |
| 0.06                   | 0.9          | 1.1          | 1.1         | 1.1   | 1.5      |
| 0.02                   | 0.9          | 1.0          | 0.9         | 1.0   | 1.1      |
| 0.01                   | 0.9          | 1.0          | 0.9         | 0.9   | 1.1      |
| 0.001                  | 0.9          | 0.9          | 0.9         | 1.0   | 1.0      |
| 0                      | 1.0          | 1.0          | 1.0         | 1.0   | 1.0      |

**D**

| Signal over Background |              |              |             |       |          |
|------------------------|--------------|--------------|-------------|-------|----------|
| (ng/mL) final          | 20,000 cells | 10,000 cells | 5,000 cells | Media | No Media |
| 400.00                 | 217.3        | 240.8        | 134.5       | 142.5 | 68.5     |
| 114.29                 | 207.6        | 240.6        | 205.9       | 143.1 | 161.3    |
| 32.65                  | 91.6         | 115.8        | 112.3       | 74.5  | 102.6    |
| 9.33                   | 24.0         | 26.8         | 29.2        | 24.8  | 62.8     |
| 2.67                   | 10.0         | 12.7         | 11.7        | 12.5  | 26.1     |
| 0.76                   | 3.1          | 4.0          | 3.9         | 3.4   | 9.4      |
| 0.22                   | 1.5          | 1.7          | 1.9         | 1.6   | 3.4      |
| 0.06                   | 1.1          | 1.2          | 1.3         | 1.2   | 1.8      |
| 0.02                   | 1.0          | 1.1          | 1.2         | 1.2   | 1.3      |
| 0.01                   | 0.9          | 1.1          | 1.2         | 1.1   | 1.1      |
| 0.001                  | 1.0          | 1.0          | 1.2         | 1.0   | 1.0      |
| 0                      | 1.0          | 1.0          | 1.0         | 1.0   | 1.0      |

**F**

| Signal over Background |              |              |             |       |          |
|------------------------|--------------|--------------|-------------|-------|----------|
| (ng/mL) final          | 20,000 cells | 10,000 cells | 5,000 cells | Media | No Media |
| 400.00                 | 272.6        | 377.3        | 271.8       | 254.8 | 385.2    |
| 114.29                 | 243.9        | 287.2        | 204.8       | 176.8 | 303.1    |
| 32.65                  | 101.2        | 108.8        | 99.6        | 89.0  | 211.9    |
| 9.33                   | 35.1         | 34.9         | 30.6        | 37.8  | 120.9    |
| 2.67                   | 9.7          | 10.8         | 11.1        | 13.6  | 31.7     |
| 0.76                   | 2.7          | 3.2          | 3.2         | 3.2   | 10.6     |
| 0.22                   | 1.4          | 1.6          | 1.6         | 1.6   | 3.4      |
| 0.06                   | 1.0          | 1.1          | 1.1         | 1.2   | 1.6      |
| 0.02                   | 0.9          | 1.0          | 0.9         | 1.1   | 1.1      |
| 0.01                   | 0.9          | 1.0          | 0.9         | 1.1   | 1.1      |
| 0.001                  | 0.9          | 1.0          | 0.8         | 1.0   | 1.1      |
| 0                      | 1.0          | 1.0          | 1.0         | 1.0   | 1.0      |

**H**

| Signal over Background |              |              |             |       |          |
|------------------------|--------------|--------------|-------------|-------|----------|
| (ng/mL) final          | 20,000 cells | 10,000 cells | 5,000 cells | Media | No Media |
| 400.00                 | 346.4        | 428.5        | 284.4       | 266.8 | 385.3    |
| 114.29                 | 288.4        | 329.5        | 219.3       | 178.7 | 290.5    |
| 32.65                  | 142.8        | 153.8        | 135.3       | 90.0  | 264.4    |
| 9.33                   | 45.3         | 54.4         | 39.4        | 44.1  | 111.7    |
| 2.67                   | 13.3         | 15.0         | 14.2        | 14.8  | 46.5     |
| 0.76                   | 4.5          | 4.9          | 4.3         | 4.4   | 10.5     |
| 0.22                   | 1.9          | 2.3          | 1.9         | 1.7   | 3.2      |
| 0.06                   | 1.2          | 1.4          | 1.3         | 1.2   | 1.5      |
| 0.02                   | 1.0          | 1.0          | 1.0         | 1.0   | 1.2      |
| 0.01                   | 1.0          | 1.1          | 1.0         | 1.0   | 1.1      |
| 0.001                  | 1.0          | 1.0          | 0.9         | 1.0   | 1.0      |
| 0                      | 1.0          | 1.0          | 1.0         | 1.0   | 1.0      |

**Figure S-6** Optimization of LB and cell density for 384-well plate viral infection simulation using recombinant NP. **(A)** Detection of titrated NP in wells culturing 20,000, 10,000, 5000, or 0 cells/well along with a no-media control without protease inhibitor in Vero-E6 cells using Pair 1+4. **(B)** S/B ratios from A. Red values indicate hook effect or below the lower limit of detection for the higher and lower concentrations of NP, respectively. **(C)** Detection of titrated NP in wells culturing 20,000, 10,000, 5000, or 0 cells/well along with a no-media control with protease inhibitor in Vero-E6 cells using Pair 1+4. **(D)** S/B ratios from C. Red values indicate hook effect or below the lower limit of detection for the higher and lower concentrations of NP, respectively. **(E)** Detection of titrated NP in wells culturing 20,000, 10,000, 5000, or 0 cells/well along with a no-media control without protease inhibitor in Vero-E6 cells using Pair 11+4. **(F)** S/B ratios from E. Red values indicate signals below the lower limit of detection for lower concentrations of NP. **(G)** Detection of titrated NP in wells culturing 20,000, 10,000, 5000, or 0 cells/well along with a no-media control with protease inhibitor in Vero-E6 cells using Pair 11+4. **(H)** S/B ratios from G. Red values indicate signals below the lower limit of detection for lower concentrations of NP. N = triplicate wells. Error bars indicate S.D.

**A**

| Signal over Background |             |             |              |
|------------------------|-------------|-------------|--------------|
| (ng/mL)<br>final       | 20 uL final | 50 uL final | 100 uL final |
| 500.00                 | 309.8       | 121.0       | 165.7        |
| 142.86                 | 453.5       | 134.1       | 218.3        |
| 40.82                  | 456.9       | 114.1       | 176.5        |
| 11.66                  | 332.7       | 63.7        | 130.7        |
| 3.33                   | 149.7       | 32.4        | 82.6         |
| 0.95                   | 52.1        | 14.8        | 36.3         |
| 0.27                   | 15.7        | 5.4         | 13.3         |
| 0.08                   | 5.2         | 2.5         | 4.9          |
| 0.02                   | 2.3         | 2.0         | 2.4          |
| 0.01                   | 1.3         | 1.2         | 1.5          |
| 0.002                  | 1.1         | 1.1         | 1.2          |
| 0.00                   | 1.0         | 1.0         | 1.0          |

**B**

| Signal over Background |       |       |        |
|------------------------|-------|-------|--------|
| (ng/mL)<br>final       | 20 uL | 50 uL | 100 uL |
| 500.00                 | 578.7 | 210.3 | 386.6  |
| 142.86                 | 639.7 | 145.9 | 322.6  |
| 40.82                  | 571.5 | 91.5  | 205.9  |
| 11.66                  | 349.1 | 62.0  | 127.9  |
| 3.33                   | 160.9 | 36.2  | 86.6   |
| 0.95                   | 55.2  | 16.1  | 37.5   |
| 0.27                   | 17.1  | 6.1   | 14.7   |
| 0.08                   | 5.9   | 2.7   | 5.2    |
| 0.02                   | 2.4   | 1.5   | 2.8    |
| 0.01                   | 1.4   | 1.2   | 1.6    |
| 0.002                  | 1.0   | 1.1   | 1.2    |
| 0.00                   | 1.0   | 1.0   | 1.0    |

**Table S-2** Optimization of assay volumes for 384-well plate using recombinant Nucleocapsid. **(A)** S/B ratios from Figure 3A. Red values indicate hook effect (upper limit) and lower limit of detection. **(B)** S/B ratios from Figure 3C. Red values indicate lower limit of detection. N = triplicate wells. Error bars indicate S.D.

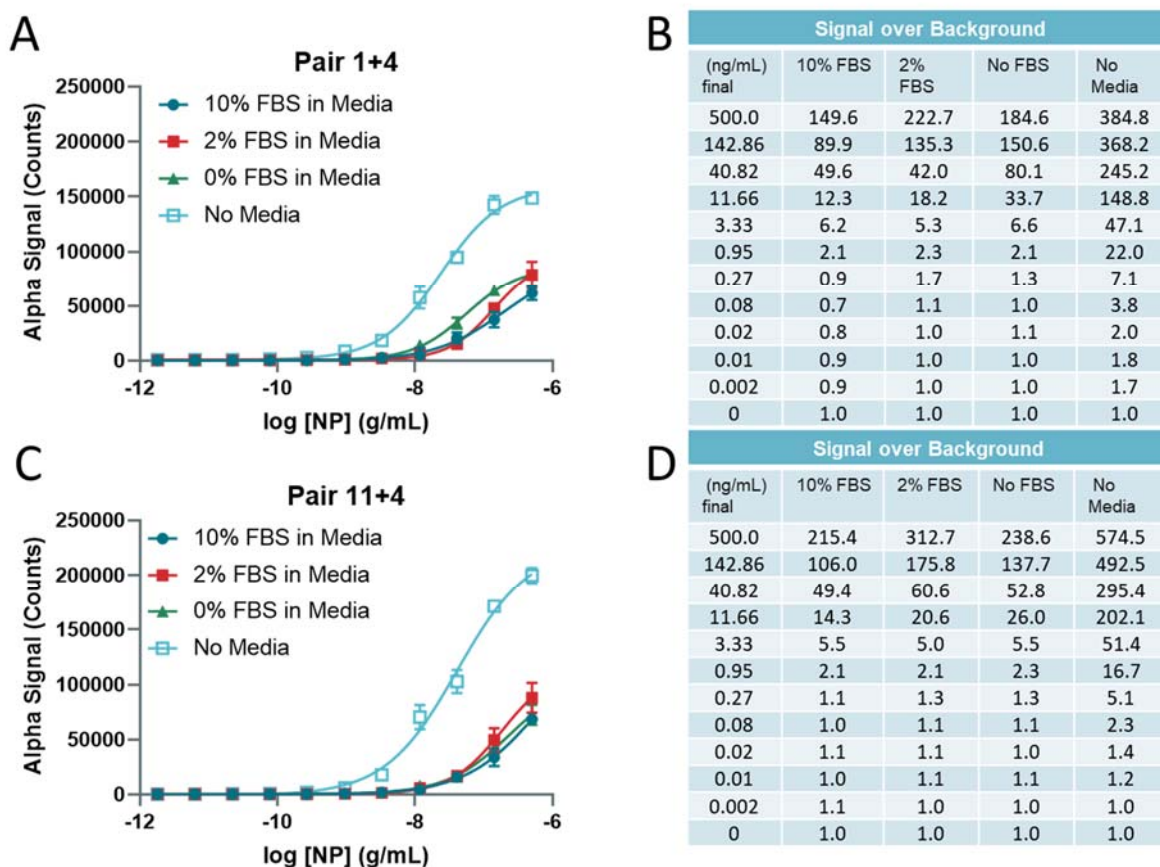

**Figure S-7** Optimization of AlphaLISA assay using different FBS percentages in cell culture media. **(A)** Detection of titrated NP in wells with 10%, 2% and 0% FBS in media as well as no media control using Pair 1+4. Assay conducted using the AlphaLISA LB. **(B)** S/B ratios from A. **(C)** Detection of titrated NP in wells with 10%, 2% and 0% FBS in media as well as no media control using Pair 1+4. Assay conducted using the AlphaLISA LB. **(D)** S/B ratios from A. N = duplicate wells. Error bars indicate S.D.

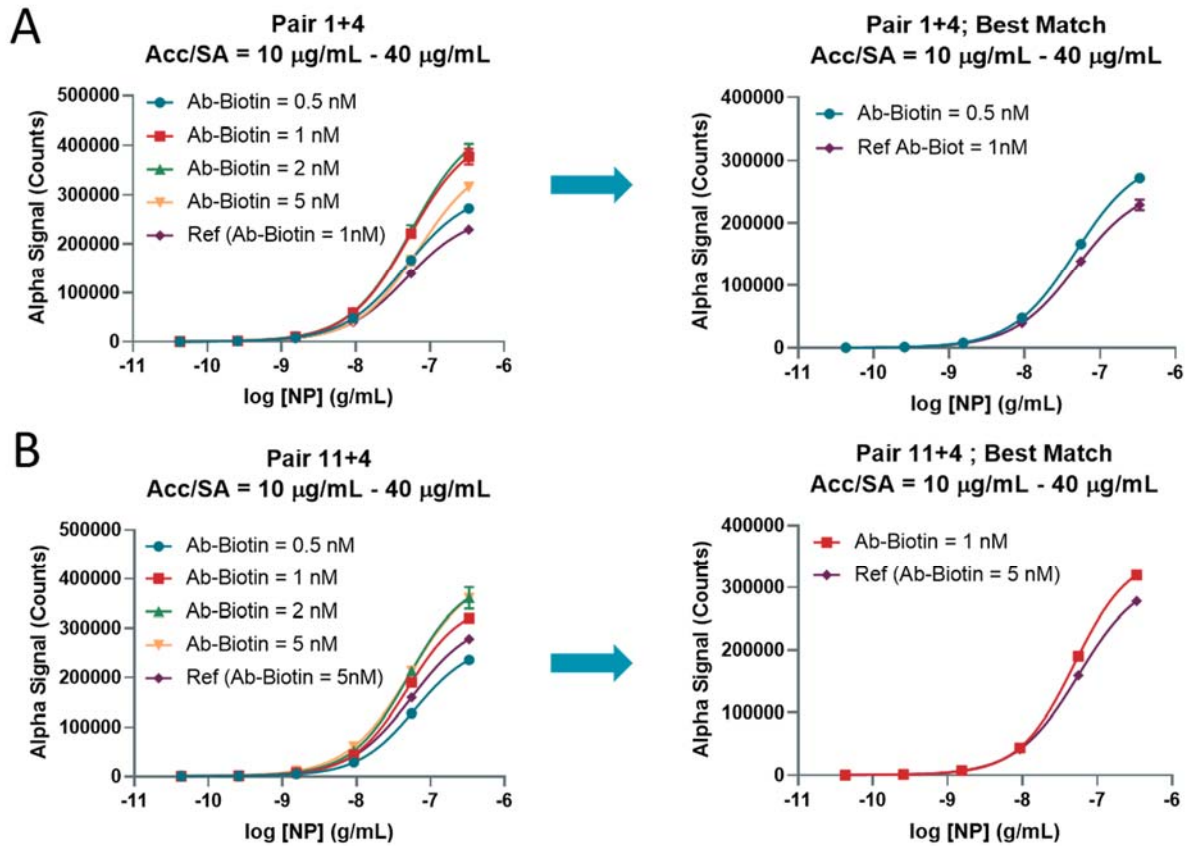

**Figure S-8** Optimization of best antibody pair and reagent concentrations of second preparation to match first preparation. **(A)** AlphaLISA counts for titrated NP using 10 µg/mL acceptor and 40 µg/mL Streptavidin for Pair 1+4 and different concentrations of Biotin. Right panel comparing the best condition from first batch to matching condition from second batch. **(B)** AlphaLISA counts for titrated NP using 10 µg/mL acceptor and 40 µg/mL Streptavidin for Pair 11+4 and different concentrations of Biotin. Right panel comparing the best condition from first batch to matching condition from second batch. N = duplicate wells. Error bars indicate S.D.



**A**

| Signal over Background |                 |                 |                |       |             |
|------------------------|-----------------|-----------------|----------------|-------|-------------|
| (ng/mL)<br>final       | 20,000<br>cells | 10,000<br>cells | 5,000<br>cells | Media | No<br>Media |
| 500.0                  | 205.3           | 284.7           | 255.2          | 300.8 | 94.8        |
| 142.86                 | 141.3           | 208.0           | 176.0          | 193.2 | 101.9       |
| 40.82                  | 88.4            | 124.7           | 126.4          | 103.4 | 110.0       |
| 11.66                  | 38.4            | 50.8            | 45.3           | 37.2  | 79.3        |
| 3.33                   | 13.3            | 17.9            | 14.7           | 14.2  | 37.5        |
| 0.95                   | 5.8             | 5.8             | 5.4            | 5.0   | 13.2        |
| 0.27                   | 2.9             | 2.8             | 2.2            | 2.3   | 5.0         |
| 0.08                   | 4.0             | 1.6             | 1.4            | 1.7   | 2.2         |
| 0.02                   | 2.6             | 1.7             | 1.1            | 1.5   | 1.5         |
| 0.01                   | 1.6             | 1.9             | 1.0            | 1.2   | 1.1         |
| 0.00                   | 1.0             | 1.6             | 1.0            | 1.3   | 1.1         |
| 0.0                    | 1.0             | 1.0             | 1.0            | 1.0   | 1.0         |

**B**

| Signal over Background |                 |                 |                |       |             |
|------------------------|-----------------|-----------------|----------------|-------|-------------|
| (ng/mL)<br>final       | 20,000<br>cells | 10,000<br>cells | 5,000<br>cells | Media | No<br>Media |
| 500.0                  | 331.6           | 325.4           | 309.5          | 245.2 | 205.1       |
| 142.86                 | 228.6           | 233.1           | 207.1          | 169.7 | 182.4       |
| 40.82                  | 119.7           | 102.4           | 74.3           | 79.3  | 128.6       |
| 11.66                  | 50.6            | 39.3            | 36.9           | 25.0  | 70.3        |
| 3.33                   | 16.0            | 14.2            | 13.4           | 10.6  | 28.3        |
| 0.95                   | 6.0             | 4.4             | 5.1            | 4.4   | 9.9         |
| 0.27                   | 2.7             | 2.2             | 2.1            | 2.5   | 4.0         |
| 0.08                   | 2.0             | 1.3             | 1.4            | 2.4   | 1.8         |
| 0.02                   | 2.4             | 1.6             | 1.1            | 2.7   | 1.2         |
| 0.01                   | 1.2             | 1.2             | 1.1            | 3.1   | 0.9         |
| 0.00                   | 1.3             | 1.0             | 1.1            | 2.2   | 0.8         |
| 0.0                    | 1.0             | 1.0             | 1.0            | 1.0   | 1.0         |

**Table S-3** Optimization of 384-well plate cell number in simulated infection using second preparation of reagents. **(A)** S/B ratios from Figure 4A. **(B)** S/B ratios from Figure 4B. N = triplicate wells. Error bars indicate S.D.

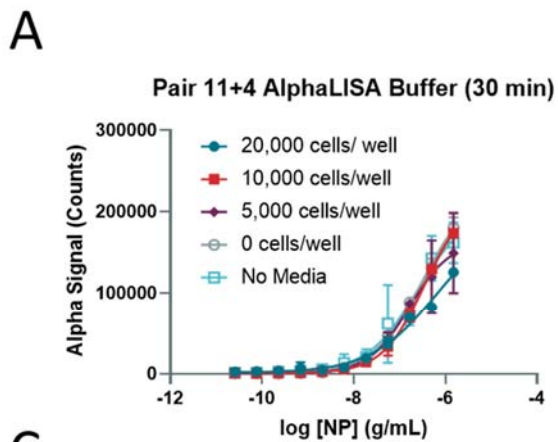

**B**

| Signal over Background |              |              |             |       |          |
|------------------------|--------------|--------------|-------------|-------|----------|
| (ng/mL) final          | 20,000 cells | 10,000 cells | 5,000 cells | Media | No Media |
| 1500.0                 | 35.8         | 77.0         | 137.2       | 290.4 | 183.8    |
| 500.00                 | 24.9         | 56.1         | 102.9       | 202.6 | 143.2    |
| 166.67                 | 19.8         | 30.3         | 75.9        | 130.4 | 69.7     |
| 55.56                  | 10.4         | 14.3         | 34.5        | 64.1  | 60.3     |
| 18.52                  | 5.3          | 5.9          | 14.2        | 22.6  | 19.8     |
| 6.17                   | 2.4          | 2.4          | 5.6         | 8.7   | 12.6     |
| 2.06                   | 1.6          | 1.0          | 2.1         | 2.7   | 5.2      |
| 0.69                   | 2.2          | 0.6          | 1.2         | 1.8   | 2.9      |
| 0.23                   | 1.2          | 0.4          | 0.9         | 1.2   | 2.1      |
| 0.08                   | 0.9          | 0.4          | 0.8         | 1.0   | 1.2      |
| 0.03                   | 0.8          | 0.5          | 0.8         | 0.9   | 1.3      |
| 0.0                    | 1.0          | 1.0          | 1.0         | 1.0   | 1.0      |

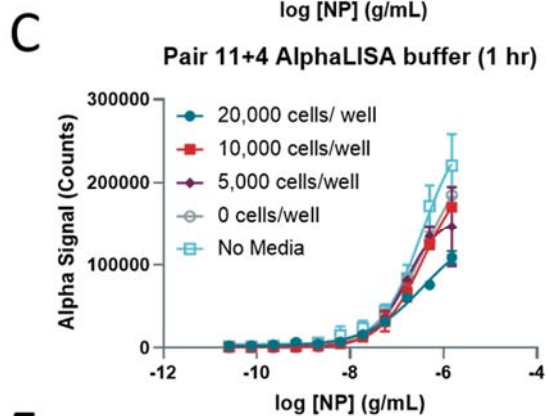

**D**

| Signal over Background |              |              |             |       |          |
|------------------------|--------------|--------------|-------------|-------|----------|
| (ng/mL) final          | 20,000 cells | 10,000 cells | 5,000 cells | Media | No Media |
| 1500.0                 | 43.2         | 87.5         | 204.4       | 326.5 | 146.0    |
| 500.00                 | 28.2         | 65.2         | 163.9       | 237.8 | 128.9    |
| 166.67                 | 23.9         | 36.2         | 118.7       | 160.6 | 64.3     |
| 55.56                  | 13.1         | 17.0         | 56.2        | 84.6  | 55.6     |
| 18.52                  | 6.6          | 7.2          | 23.4        | 30.3  | 18.2     |
| 6.17                   | 2.7          | 2.9          | 9.2         | 11.7  | 11.9     |
| 2.06                   | 1.5          | 1.2          | 3.3         | 3.2   | 4.9      |
| 0.69                   | 2.4          | 0.6          | 1.5         | 2.0   | 2.7      |
| 0.23                   | 1.3          | 0.4          | 1.0         | 1.3   | 2.2      |
| 0.08                   | 1.0          | 0.4          | 0.9         | 1.0   | 1.3      |
| 0.03                   | 0.8          | 0.5          | 0.9         | 1.0   | 1.3      |
| 0.0                    | 1.0          | 1.0          | 1.0         | 1.0   | 1.0      |

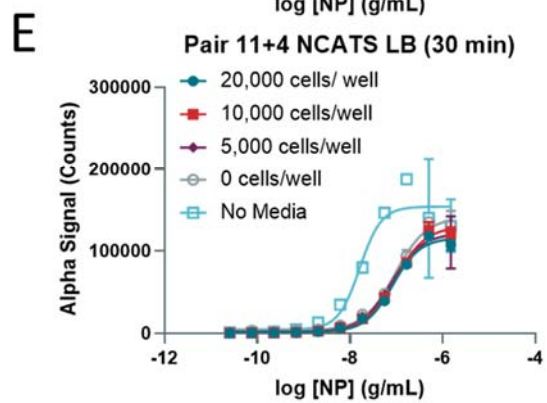

**F**

| Signal over Background |              |              |             |       |          |
|------------------------|--------------|--------------|-------------|-------|----------|
| (ng/mL) final          | 20,000 cells | 10,000 cells | 5,000 cells | Media | No Media |
| 1500.0                 | 212.0        | 262.9        | 233.0       | 298.3 | 118.1    |
| 500.00                 | 234.1        | 271.4        | 263.4       | 306.1 | 126.6    |
| 166.67                 | 165.8        | 185.6        | 179.5       | 212.9 | 169.1    |
| 55.56                  | 78.4         | 94.0         | 98.3        | 109.0 | 132.3    |
| 18.52                  | 35.5         | 38.7         | 42.9        | 52.0  | 72.3     |
| 6.17                   | 12.6         | 15.2         | 17.1        | 21.9  | 31.5     |
| 2.06                   | 4.6          | 5.9          | 6.4         | 11.3  | 12.0     |
| 0.69                   | 2.1          | 2.5          | 3.3         | 7.9   | 4.5      |
| 0.23                   | 1.3          | 1.5          | 1.8         | 3.0   | 2.0      |
| 0.08                   | 1.1          | 1.1          | 1.2         | 2.1   | 1.1      |
| 0.03                   | 0.9          | 1.0          | 1.0         | 1.5   | 0.9      |
| 0.0                    | 1.0          | 1.0          | 1.0         | 1.0   | 1.0      |

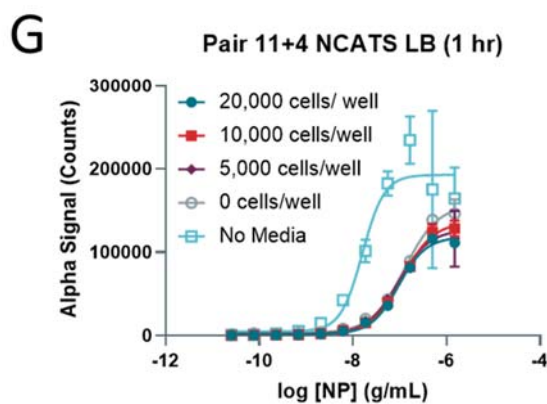

**H**

| Signal over Background |              |              |             |       |          |
|------------------------|--------------|--------------|-------------|-------|----------|
| (ng/mL) final          | 20,000 cells | 10,000 cells | 5,000 cells | Media | No Media |
| 1500.0                 | 187.1        | 259.2        | 225.2       | 267.2 | 137.2    |
| 500.00                 | 195.3        | 251.6        | 245.8       | 254.0 | 146.1    |
| 166.67                 | 137.1        | 167.3        | 157.8       | 163.3 | 195.5    |
| 55.56                  | 60.8         | 80.4         | 84.5        | 79.6  | 152.3    |
| 18.52                  | 26.6         | 31.0         | 34.3        | 36.7  | 84.8     |
| 6.17                   | 9.2          | 12.1         | 13.8        | 15.3  | 35.6     |
| 2.06                   | 3.6          | 5.0          | 5.2         | 7.8   | 12.5     |
| 0.69                   | 1.9          | 2.5          | 2.9         | 5.4   | 4.7      |
| 0.23                   | 1.2          | 1.4          | 1.7         | 2.2   | 1.9      |
| 0.08                   | 1.1          | 1.1          | 1.2         | 1.6   | 1.0      |
| 0.03                   | 0.9          | 1.0          | 1.1         | 1.2   | 0.7      |
| 0.0                    | 1.0          | 1.0          | 1.0         | 1.0   | 1.0      |

**Figure S-9** Optimization of LB, cell density, and incubation time for 384-well plate viral infection simulation using recombinant NP and second batch of reagents. **(A)** Detection of titrated NP in wells culturing 20,000, 10,000, 5000, or 0 cells/well along with a no-media control in Vero-E6 cells using Pair 11+4 and AlphaLISA LB after 30 min. **(B)** S/B ratios from A. **(C)** Detection of titrated NP in wells culturing 20,000, 10,000, 5000, or 0 cells/well along with a no-media control in Vero-E6 cells using Pair 11+4 and AlphaLISA buffer after 1 hr. **(D)** S/B ratios from C. **(E)** Detection of titrated NP in wells culturing 20,000, 10,000, 5000, or 0 cells/well along with a no-media control in Vero-E6 cells using Pair 11+4 and NCATS LB after 30 min. **(F)** S/B ratios from E. **(G)** Detection of titrated NP in wells culturing 20,000, 10,000, 5000, or 0 cells/well along with a no media control in Vero-E6 cells using Pair 11+4 after 1 hr. **(H)** S/B ratios from G. N = triplicate wells. Error bars indicate S.D.

**A**

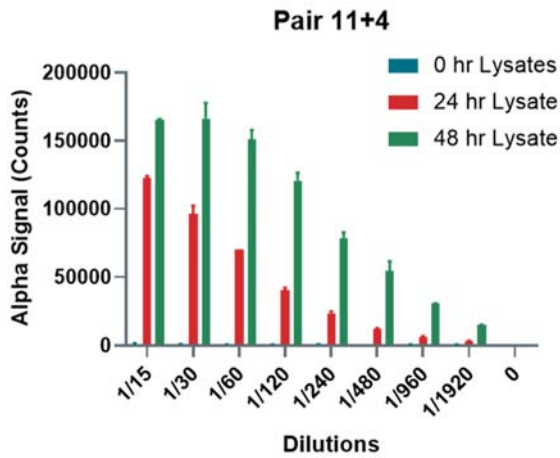

**B**

| Signal over Background |              |               |               |
|------------------------|--------------|---------------|---------------|
| Sample dilution        | 0 hr Lysates | 24 hr Lysates | 48 hr Lysates |
| 1/15                   | 2.4          | 276.8         | 371.2         |
| 1/30                   | 2.1          | 216.5         | 373.2         |
| 1/60                   | 1.8          | 158.0         | 339.3         |
| 1/120                  | 1.8          | 91.3          | 271.4         |
| 1/240                  | 1.8          | 53.0          | 176.6         |
| 1/480                  | 1.4          | 27.6          | 122.9         |
| 1/960                  | 1.3          | 14.8          | 68.8          |
| 1/1920                 | 1.2          | 7.6           | 33.7          |
| 0.0                    | 1.0          | 1.0           | 1.0           |

**C**

| Lysate Dilution Table |                 |
|-----------------------|-----------------|
| Fold dilution         | Number of Cells |
| 1/1                   | 450,000         |
| 1/15                  | 30000           |
| 1/30                  | 15000           |
| 1/60                  | 7500            |
| 1/120                 | 3750            |
| 1/240                 | 1875            |
| 1/480                 | 938             |
| 1/960                 | 469             |
| 1/1920                | 234             |

**D**

| Interpolated Concentration (ng/mL) |        |
|------------------------------------|--------|
| 24 hr Lysate                       | 7,300  |
| 48 hr Lysate                       | 34,092 |

**Figure S-10** Estimation of viral NP concentration in viral lysates. **(A)** Detection of titrated 0 hr, 24 hr, and 48 hr lysates with NCATS LB using pair 11+4. **(B)** S/B calculation from graph in A. Red values indicate linear range of the curve. **(C)** Interpolated concentrations of NP in 24 hr and 48 hr viral cell lysates. **(D)** Interpolated NP (ng/mL) from samples in A. N = duplicate wells. Error bars indicate S.D.

A

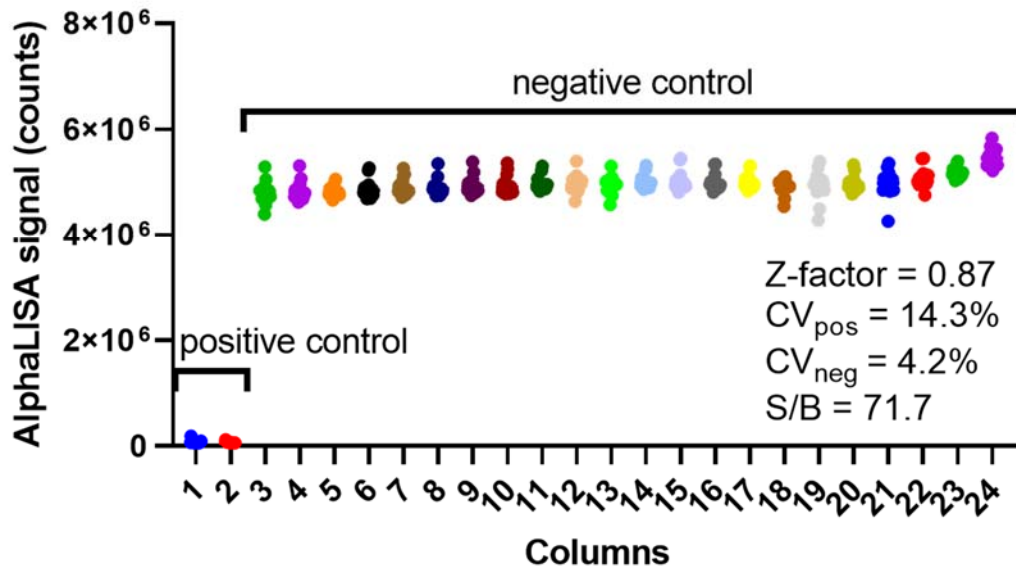

B

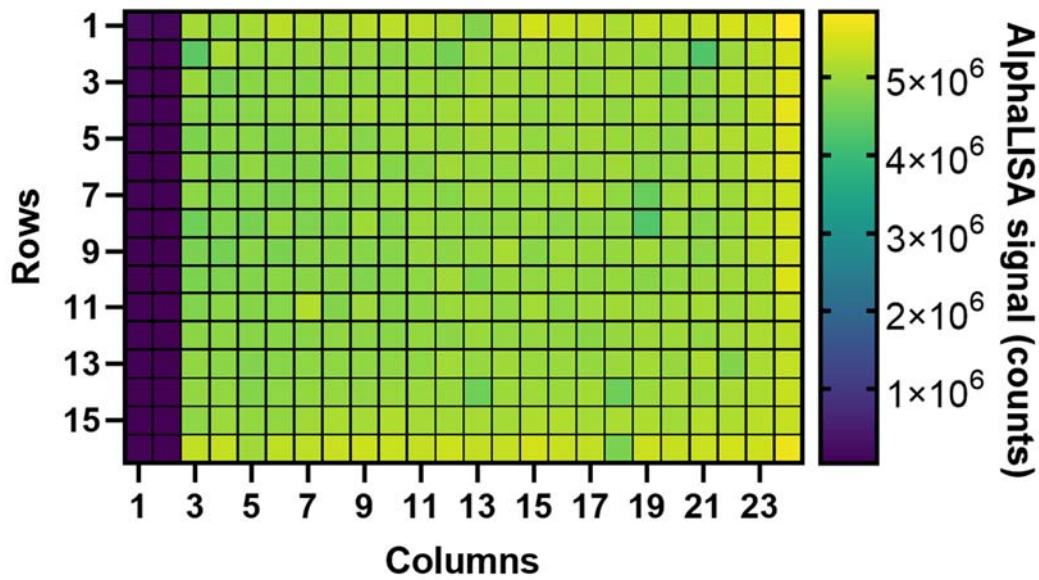

**Figure S-11** Stability of the assay after 24 hours. **(A)** Graph illustrating the AlphaLISA signal counts per well in each column and the calculated plate statistics for a 384-well plate using a total volume of 16  $\mu$ L. The positive control is media only and the negative control is media with 500 ng/mL recombinant NP. **(B)** Heat map demonstrating the AlphaLISA signal counts of each well.
